# Supplementary material for: An ATP-selective, lanthanide complex luminescent probe
Source: Royal Society of Chemistry journal article supplement (doi:10.1039/c3dt50986a), 2013-01-01
Supplement: c3dt50986a.pdf [file c3dt50986a.pdf]

## Supporting information

### An ATP-selective, Lanthanide Complex Luminescent Probe

Xiao Liu, Jun Xu, Yinyun Lv, Wenyu Wu, Weisheng Liu, and Yu Tang\*

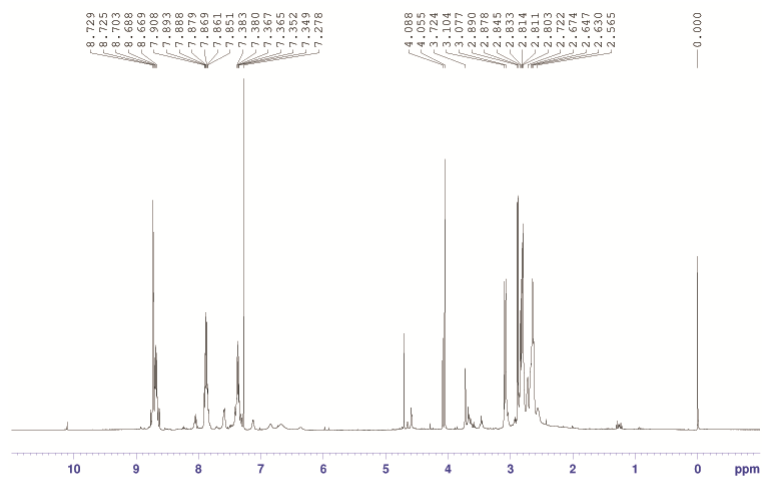

Fig. S1  $^1\text{H}$  NMR spectrum of the ligand **5** ( $\text{CDCl}_3$ , 400 MHz).

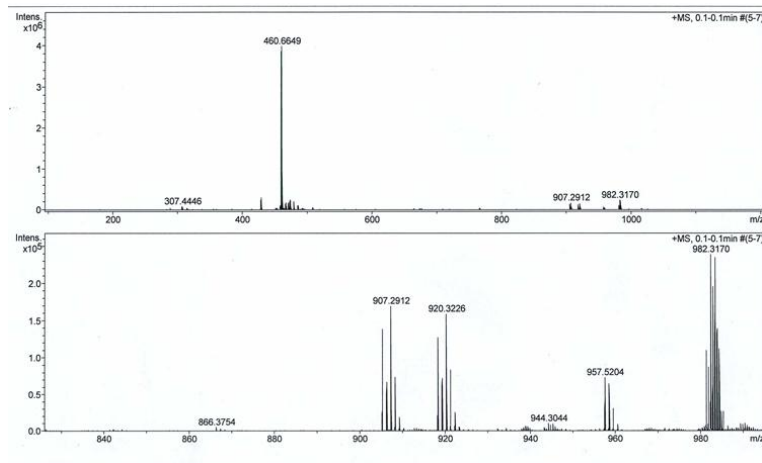

Fig. S2 Mass spectra of probe **1**.

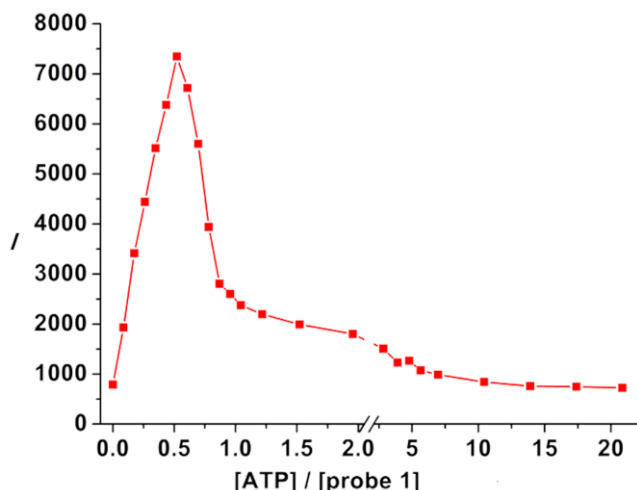

**Fig. S3** Luminescence titrations of probe **1** with ATP in pure water at pH 6.8 (30 mM HEPES) with an excitation at 335 nm (excitation slit width = 10 nm and emission slit width = 5 nm).

The association constant was calculated using a modified Benesi-Hildebrand equation [Eq. (1)]<sup>1a</sup> from the results of fluorescence titration.<sup>1</sup>

$$\frac{1}{F - F_0} = \frac{1}{K^{0.5}(F_{\max} - F_0)[M^{n-}]^{0.5}} + \frac{1}{F_{\max} - F_0} \quad (1)$$

where  $F_0$ ,  $F_{\max}$ , and  $F$  represent the luminescence intensity of probe **1**, the maximum luminescence intensity observed in the presence of ATP, and the luminescence intensity at a certain concentration of ATP, respectively.  $K$  is the association constant ( $M^{-2}$ ) and was determined from the slope of the linear plot, and  $[M^{n-}]$  is the concentration of ATP added during the luminescence titrations.

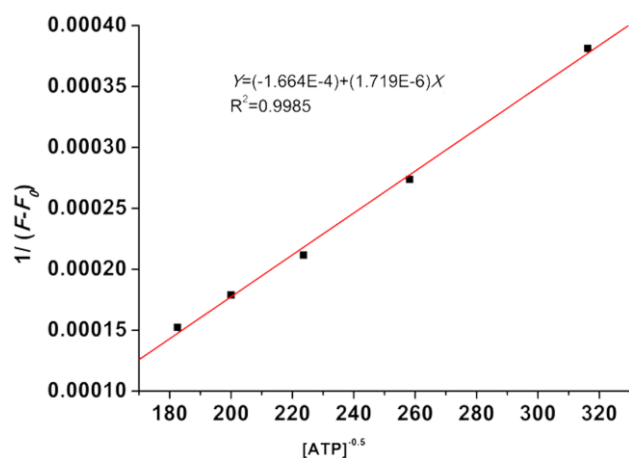

**Fig. 3** Corresponding linear regression plot of  $1/(F-F_0)$  vs.  $[ATP]^{0.5}$ .

## References for supporting information

- 1 (a) W. Wu, Z. Sun, Y. Zhang, J. Xu, H. Yu, X. Liu, Q. Wang, W. Liu and Y. Tang, *Chem. Commun.*, 2012, **48**, 11017; (b) S. Sukdeb, M. Prasenjit, R. G. Upendar, E. Suresh, C. Arindam, B. Mithu, K. G. Sudip and D. Amitava, *Inorg. Chem.*, 2012, **51**, 336; (c) Y. Hong, Z. Zhou, K. Huang, M. Yu, F. Li, T. Yi and C. Huang, *Org. Lett.*, 2007, **9**, 4729.
